# Supplementary material
Source: HighWire-hosted journal article supplement (https://bmjopen.bmj.com/content/14/6/e081280)

| ID- RAYAN | DOI | Study details | Authors | Year | Title |
|-----------|-----|---------------|---------|------|-------|
|-----------|-----|---------------|---------|------|-------|

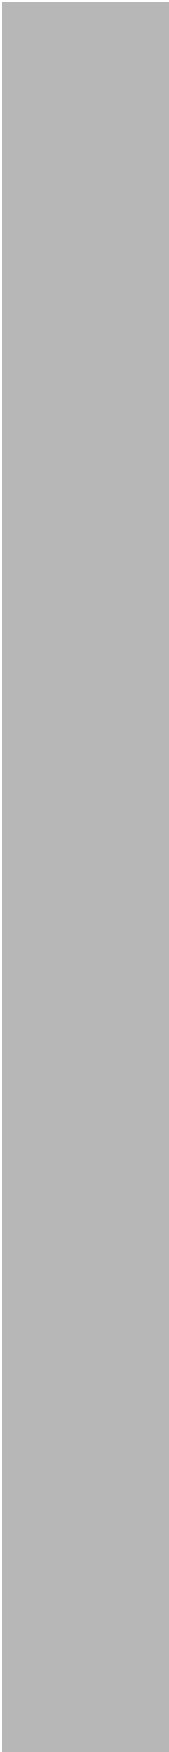



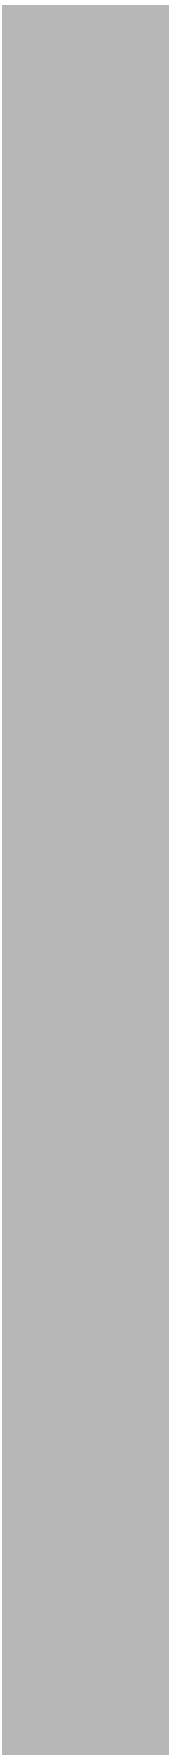































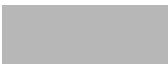

| Study type | Study characteristics | Main study focus | Study length | Study Years | Population Characteristics | Population Size |
|------------|-----------------------|------------------|--------------|-------------|----------------------------|-----------------|
|            |                       |                  |              |             |                            |                 |

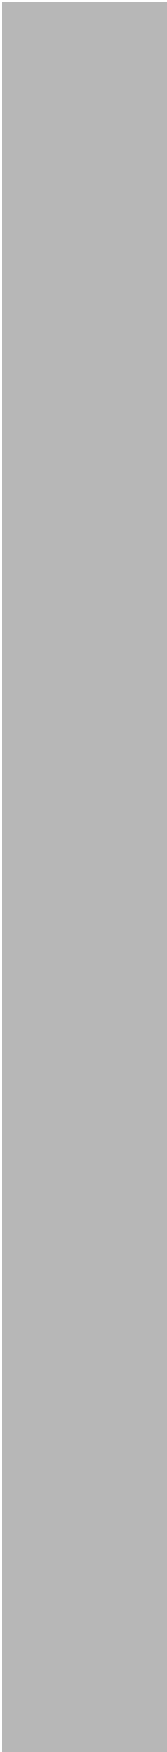



































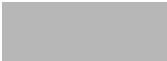

| Patients with<br>AD | Patients with<br>ADHD | Patients with<br>AD/ADHD | Patients with<br>ASD | Patients with<br>AD/ASD | AD diagnosis |
|---------------------|-----------------------|--------------------------|----------------------|-------------------------|--------------|
|---------------------|-----------------------|--------------------------|----------------------|-------------------------|--------------|







































| ADHD diagnosis | ASD diagnosis | AD traits | ADHD traits | ASD traits | Data Source | Population Age |
|----------------|---------------|-----------|-------------|------------|-------------|----------------|
|----------------|---------------|-----------|-------------|------------|-------------|----------------|









































| Total<br>population<br>sex, male (%) | Patients with<br>AD, male (%) | Country/Regi<br>on | Socioeconom<br>ic status | Miscellaneous | Funding | Conflicts of<br>Interest |
|--------------------------------------|-------------------------------|--------------------|--------------------------|---------------|---------|--------------------------|
|--------------------------------------|-------------------------------|--------------------|--------------------------|---------------|---------|--------------------------|

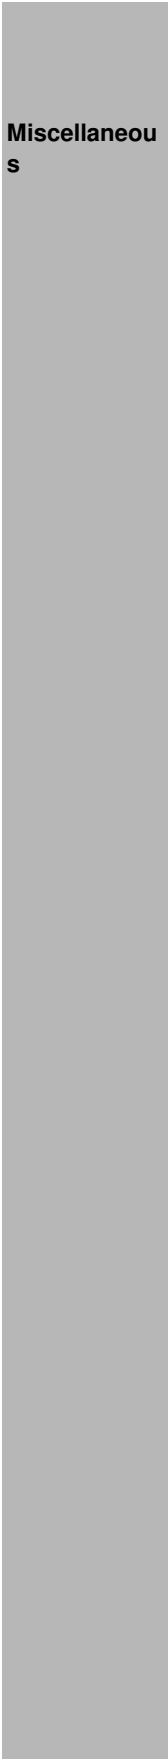

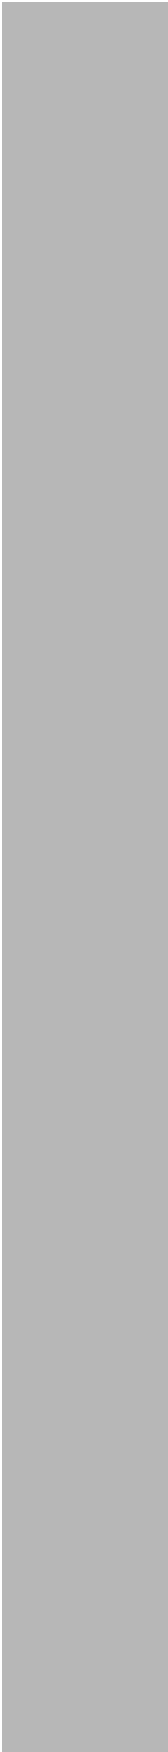



































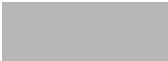

Potentially relevant references

Question 1: Mutual traits

I: Trait

I: Outcome

I: Effects

Question 2: Hypotheses on shared symptomatology

I: Hypothesis

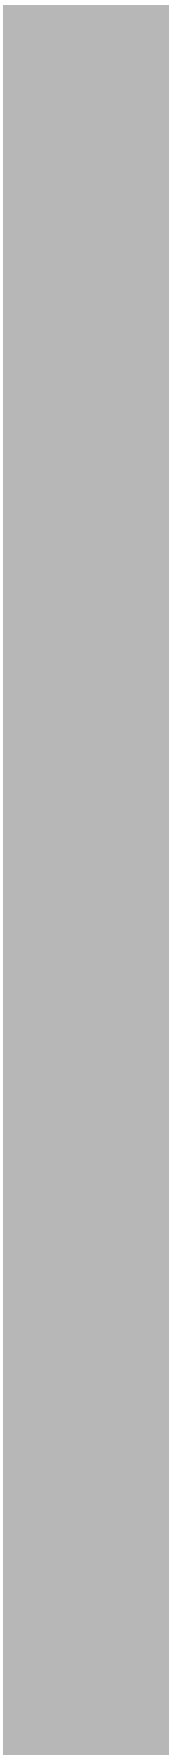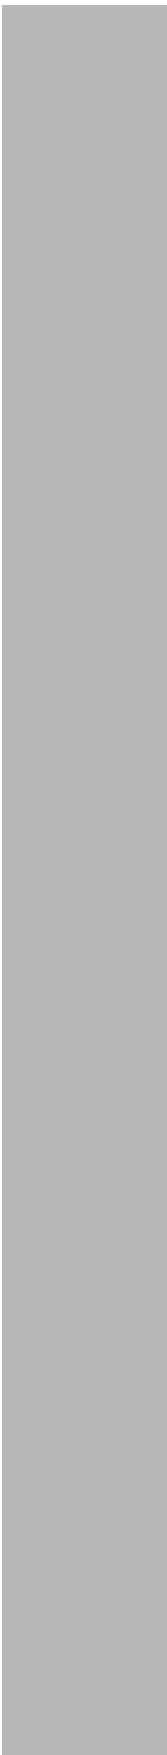





































| Question 3:<br>Mentioned<br>Knowledge<br>gaps for<br>shared<br>etiology |  | I: Hypothesis |  | I: Outcome |  | I: Effect |  |
|-------------------------------------------------------------------------|--|---------------|--|------------|--|-----------|--|
| I: Outcome                                                              |  | I: Effect     |  |            |  |           |  |
|                                                                         |  |               |  |            |  |           |  |
|                                                                         |  |               |  |            |  |           |  |
|                                                                         |  |               |  |            |  |           |  |
|                                                                         |  |               |  |            |  |           |  |
|                                                                         |  |               |  |            |  |           |  |
|                                                                         |  |               |  |            |  |           |  |
|                                                                         |  |               |  |            |  |           |  |
|                                                                         |  |               |  |            |  |           |  |
|                                                                         |  |               |  |            |  |           |  |
|                                                                         |  |               |  |            |  |           |  |
|                                                                         |  |               |  |            |  |           |  |
|                                                                         |  |               |  |            |  |           |  |
|                                                                         |  |               |  |            |  |           |  |
|                                                                         |  |               |  |            |  |           |  |
|                                                                         |  |               |  |            |  |           |  |
|                                                                         |  |               |  |            |  |           |  |
|                                                                         |  |               |  |            |  |           |  |
|                                                                         |  |               |  |            |  |           |  |
|                                                                         |  |               |  |            |  |           |  |
|                                                                         |  |               |  |            |  |           |  |
|                                                                         |  |               |  |            |  |           |  |
|                                                                         |  |               |  |            |  |           |  |
|                                                                         |  |               |  |            |  |           |  |
|                                                                         |  |               |  |            |  |           |  |
|                                                                         |  |               |  |            |  |           |  |
|                                                                         |  |               |  |            |  |           |  |
|                                                                         |  |               |  |            |  |           |  |
|                                                                         |  |               |  |            |  |           |  |
|                                                                         |  |               |  |            |  |           |  |
|                                                                         |  |               |  |            |  |           |  |
|                                                                         |  |               |  |            |  |           |  |
|                                                                         |  |               |  |            |  |           |  |
|                                                                         |  |               |  |            |  |           |  |
|                                                                         |  |               |  |            |  |           |  |
|                                                                         |  |               |  |            |  |           |  |
|                                                                         |  |               |  |            |  |           |  |
|                                                                         |  |               |  |            |  |           |  |
|                                                                         |  |               |  |            |  |           |  |
|                                                                         |  |               |  |            |  |           |  |
|                                                                         |  |               |  |            |  |           |  |
|                                                                         |  |               |  |            |  |           |  |
|                                                                         |  |               |  |            |  |           |  |
|                                                                         |  |               |  |            |  |           |  |
|                                                                         |  |               |  |            |  |           |  |
|                                                                         |  |               |  |            |  |           |  |
|                                                                         |  |               |  |            |  |           |  |
|                                                                         |  |               |  |            |  |           |  |
|                                                                         |  |               |  |            |  |           |  |
|                                                                         |  |               |  |            |  |           |  |
|                                                                         |  |               |  |            |  |           |  |
|                                                                         |  |               |  |            |  |           |  |
|                                                                         |  |               |  |            |  |           |  |
|                                                                         |  |               |  |            |  |           |  |
|                                                                         |  |               |  |            |  |           |  |
|                                                                         |  |               |  |            |  |           |  |
|                                                                         |  |               |  |            |  |           |  |
|                                                                         |  |               |  |            |  |           |  |
|                                                                         |  |               |  |            |  |           |  |
|                                                                         |  |               |  |            |  |           |  |
|                                                                         |  |               |  |            |  |           |  |
|                                                                         |  |               |  |            |  |           |  |
|                                                                         |  |               |  |            |  |           |  |
|                                                                         |  |               |  |            |  |           |  |
|                                                                         |  |               |  |            |  |           |  |
|                                                                         |  |               |  |            |  |           |  |
|                                                                         |  |               |  |            |  |           |  |
|                                                                         |  |               |  |            |  |           |  |
|                                                                         |  |               |  |            |  |           |  |
|                                                                         |  |               |  |            |  |           |  |
|                                                                         |  |               |  |            |  |           |  |
|                                                                         |  |               |  |            |  |           |  |
|                                                                         |  |               |  |            |  |           |  |
|                                                                         |  |               |  |            |  |           |  |
|                                                                         |  |               |  |            |  |           |  |
|                                                                         |  |               |  |            |  |           |  |
|                                                                         |  |               |  |            |  |           |  |
|                                                                         |  |               |  |            |  |           |  |
|                                                                         |  |               |  |            |  |           |  |
|                                                                         |  |               |  |            |  |           |  |
|                                                                         |  |               |  |            |  |           |  |
|                                                                         |  |               |  |            |  |           |  |
|                                                                         |  |               |  |            |  |           |  |
|                                                                         |  |               |  |            |  |           |  |
|                                                                         |  |               |  |            |  |           |  |
|                                                                         |  |               |  |            |  |           |  |
|                                                                         |  |               |  |            |  |           |  |
|                                                                         |  |               |  |            |  |           |  |
|                                                                         |  |               |  |            |  |           |  |
|                                                                         |  |               |  |            |  |           |  |
|                                                                         |  |               |  |            |  |           |  |
|                                                                         |  |               |  |            |  |           |  |
|                                                                         |  |               |  |            |  |           |  |
|                                                                         |  |               |  |            |  |           |  |
|                                                                         |  |               |  |            |  |           |  |
|                                                                         |  |               |  |            |  |           |  |
|                                                                         |  |               |  |            |  |           |  |
|                                                                         |  |               |  |            |  |           |  |
|                                                                         |  |               |  |            |  |           |  |
|                                                                         |  |               |  |            |  |           |  |
|                                                                         |  |               |  |            |  |           |  |
|                                                                         |  |               |  |            |  |           |  |
|                                                                         |  |               |  |            |  |           |  |
|                                                                         |  |               |  |            |  |           |  |
|                                                                         |  |               |  |            |  |           |  |
|                                                                         |  |               |  |            |  |           |  |
|                                                                         |  |               |  |            |  |           |  |
|                                                                         |  |               |  |            |  |           |  |
|                                                                         |  |               |  |            |  |           |  |
|                                                                         |  |               |  |            |  |           |  |
|                                                                         |  |               |  |            |  |           |  |
|                                                                         |  |               |  |            |  |           |  |
|                                                                         |  |               |  |            |  |           |  |
|                                                                         |  |               |  |            |  |           |  |
|                                                                         |  |               |  |            |  |           |  |
|                                                                         |  |               |  |            |  |           |  |
|                                                                         |  |               |  |            |  |           |  |
|                                                                         |  |               |  |            |  |           |  |
|                                                                         |  |               |  |            |  |           |  |
|                                                                         |  |               |  |            |  |           |  |
|                                                                         |  |               |  |            |  |           |  |
|                                                                         |  |               |  |            |  |           |  |
|                                                                         |  |               |  |            |  |           |  |
|                                                                         |  |               |  |            |  |           |  |
|                                                                         |  |               |  |            |  |           |  |
|                                                                         |  |               |  |            |  |           |  |
|                                                                         |  |               |  |            |  |           |  |
|                                                                         |  |               |  |            |  |           |  |
|                                                                         |  |               |  |            |  |           |  |
|                                                                         |  |               |  |            |  |           |  |
|                                                                         |  |               |  |            |  |           |  |
| </                                                                      |  |               |  |            |  |           |  |

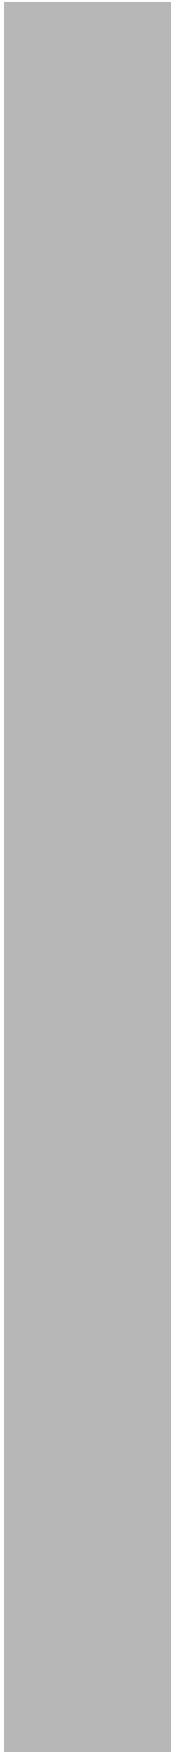

































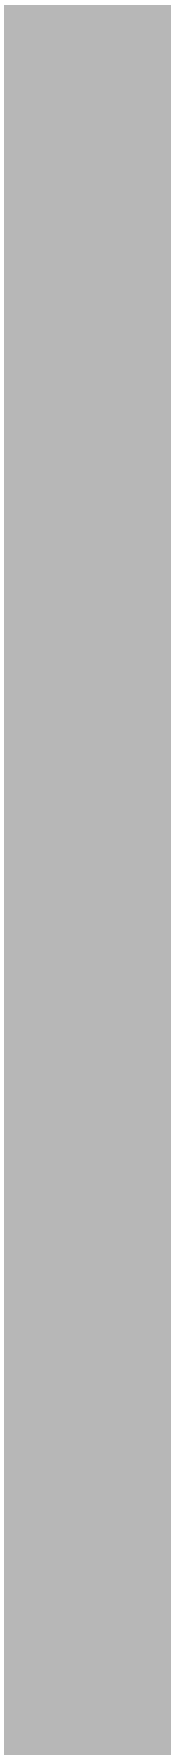

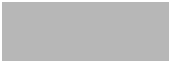

Limitations

Other remarks

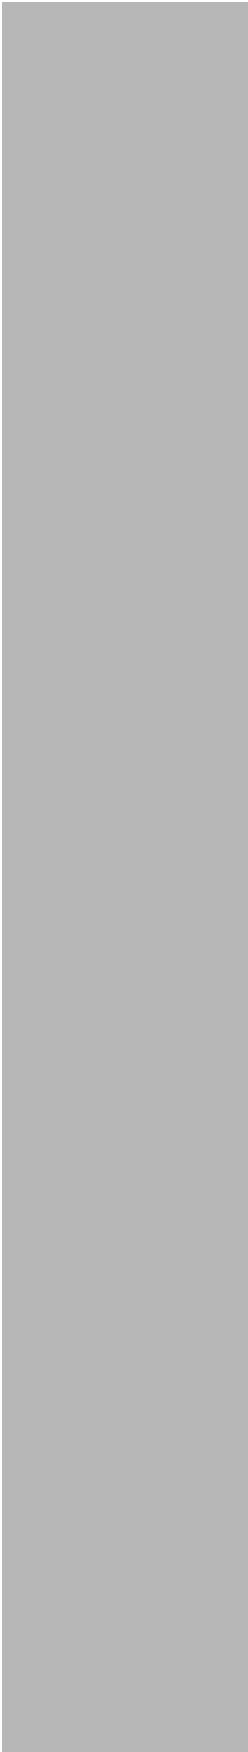



































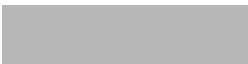

Supplement: inline-supplementary-material-2 [file inline-supplementary-material-2.pdf]
